# Supplementary material for: Fluorescent stilbazolium dyes as probes of the norepinephrine transporter: structural insights into substrate binding
Source: Royal Society of Chemistry journal article supplement (doi:10.1039/c2ob26633d), 2012-01-01
Supplement: c2ob26633d.pdf [file c2ob26633d.pdf]

*Supporting Information to Accompany:*

**Fluorescent stilbazolium dyes as probes of the norepinephrine transporter: structural insights into substrate binding**

*James N. Wilson,\* W. Michael Babinchak, Adrienne S. Brown, Clark D. Ridge, Jamie D. Walls*

Department of Chemistry, University of Miami, 1301 Memorial Drive, Coral Gables, FL 33124

|                                                                                                                               |     |
|-------------------------------------------------------------------------------------------------------------------------------|-----|
| <sup>1</sup> H-NMR of <b>11</b> , <b>D2</b> and <b>H2-6</b> .....                                                             | S2  |
| <sup>13</sup> C-NMR of <b>11</b> , <b>D2</b> and <b>H2-6</b> .....                                                            | S6  |
| HSQC of <b>11</b> .....                                                                                                       | S10 |
| <b>Table S1.</b> S <sub>0</sub> →S <sub>1</sub> transition energies and oscillator strength vs. interplanar twist angle ..... | S11 |

$^1\text{H}$  NMR of **11**

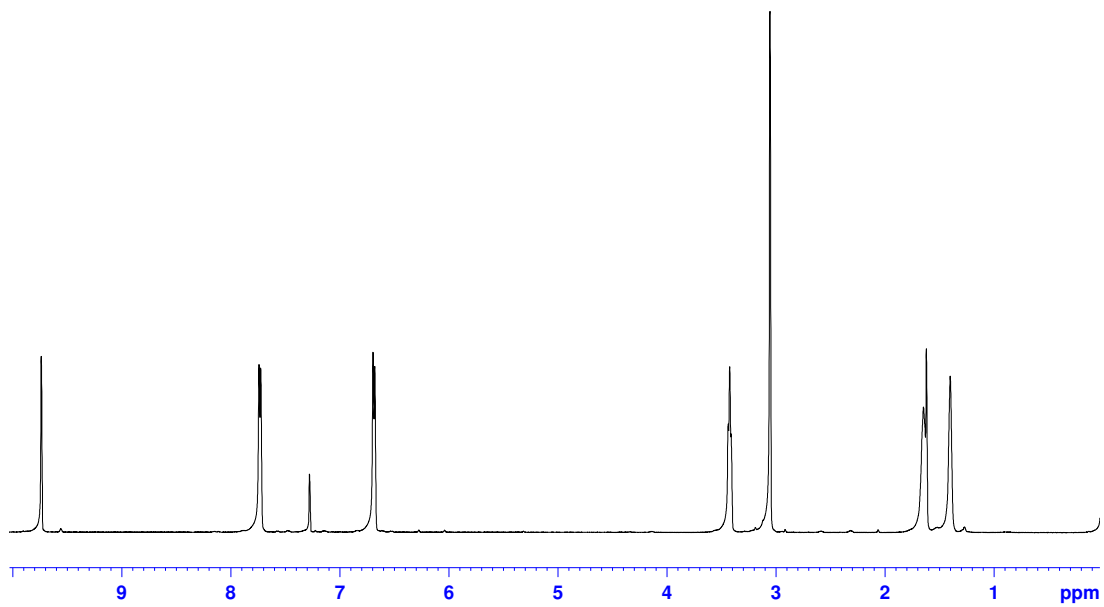

$^1\text{H}$  NMR of **D2**

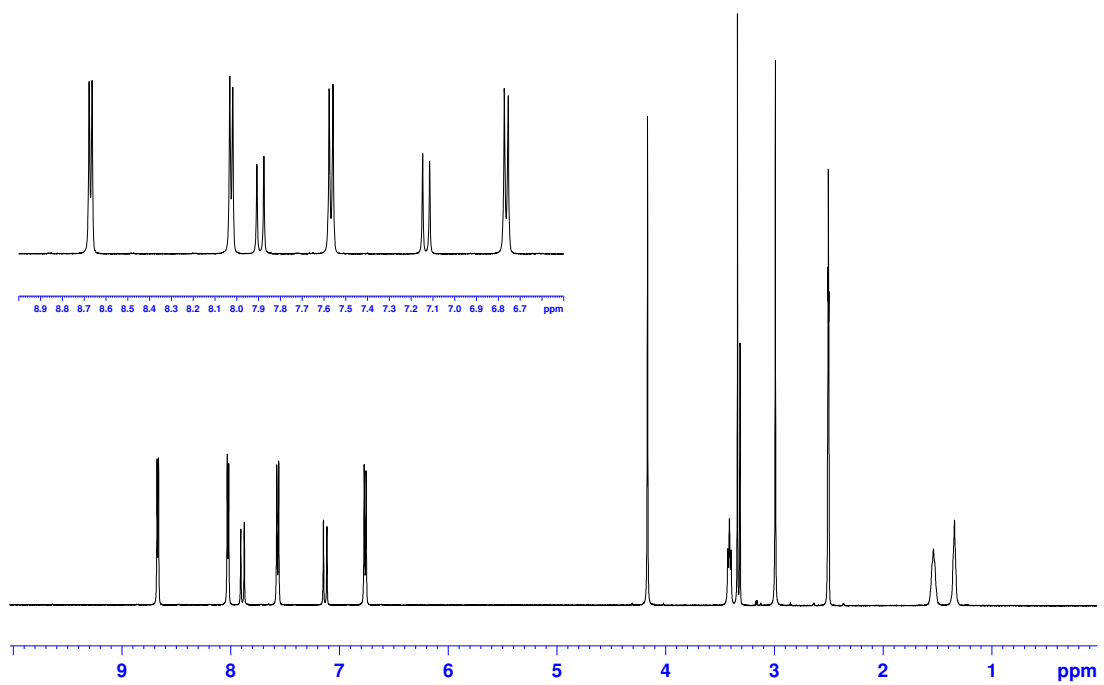

$^1\text{H}$  NMR of **H2**

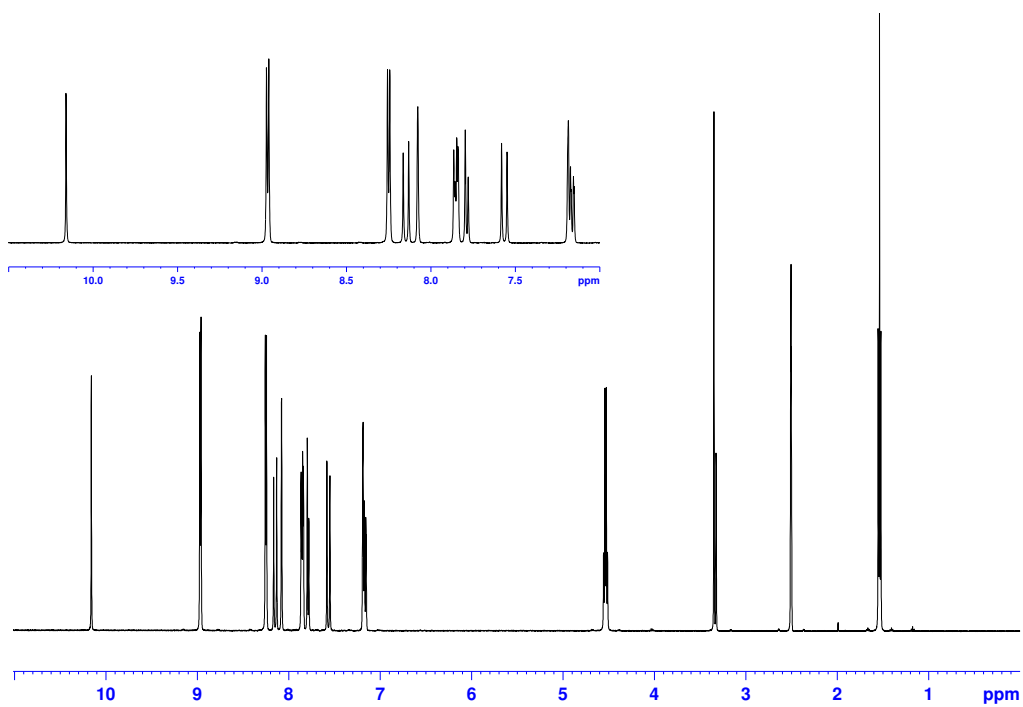

$^1\text{H}$  NMR of **H3**

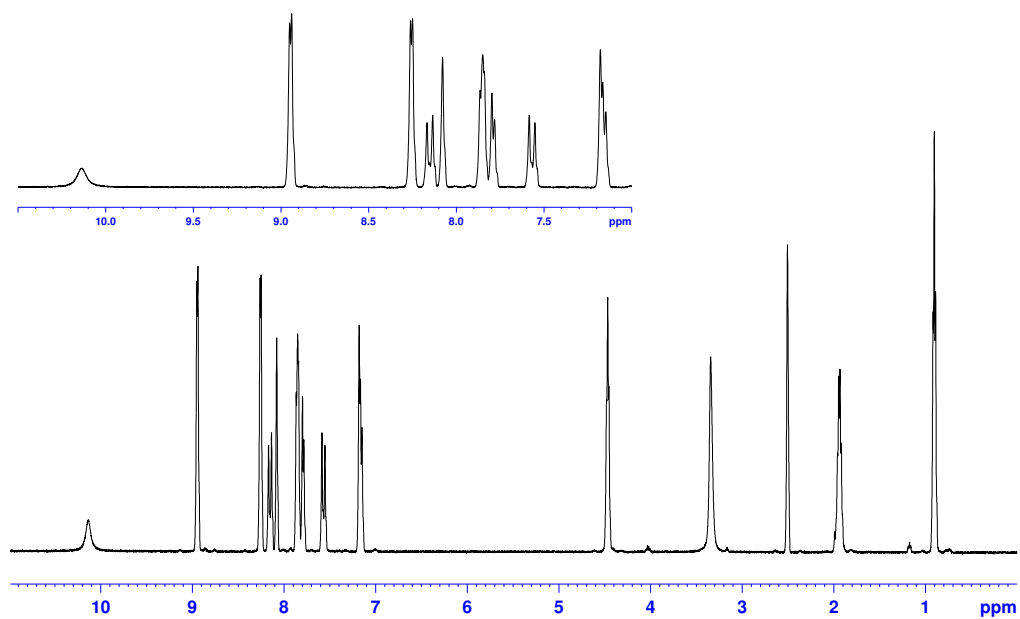

### $^1\text{H}$ NMR of **H4**

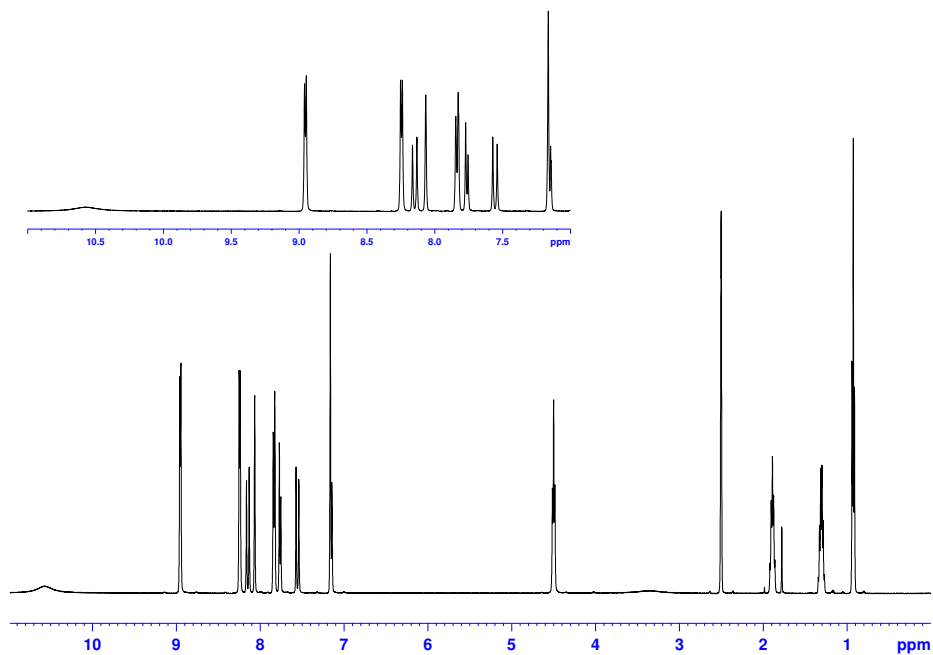

### $^1\text{H}$ NMR of **H5**

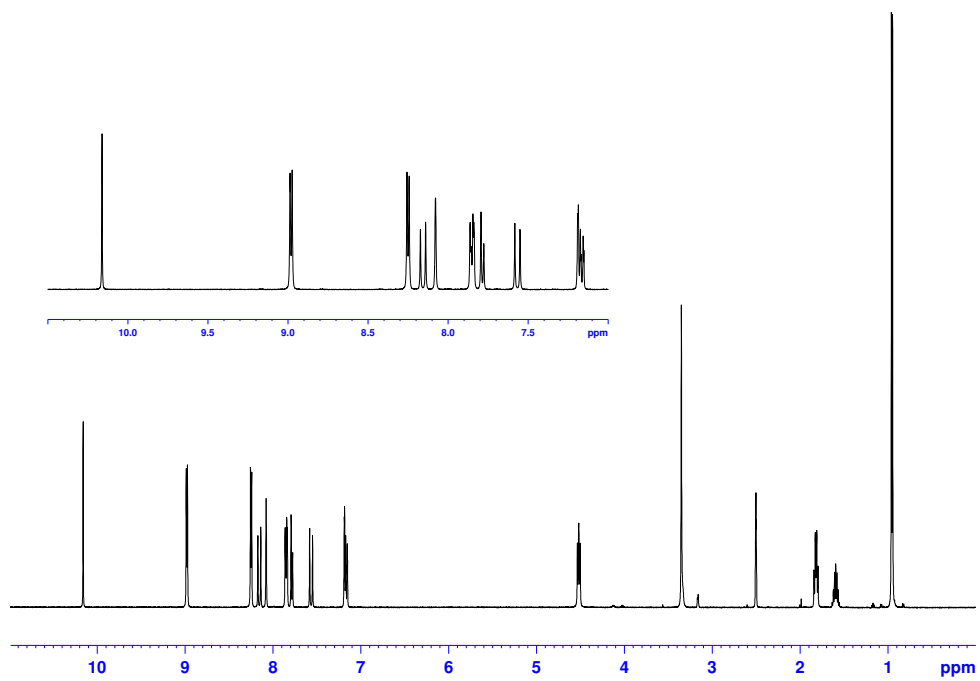

$^1\text{H}$  NMR of **H6**

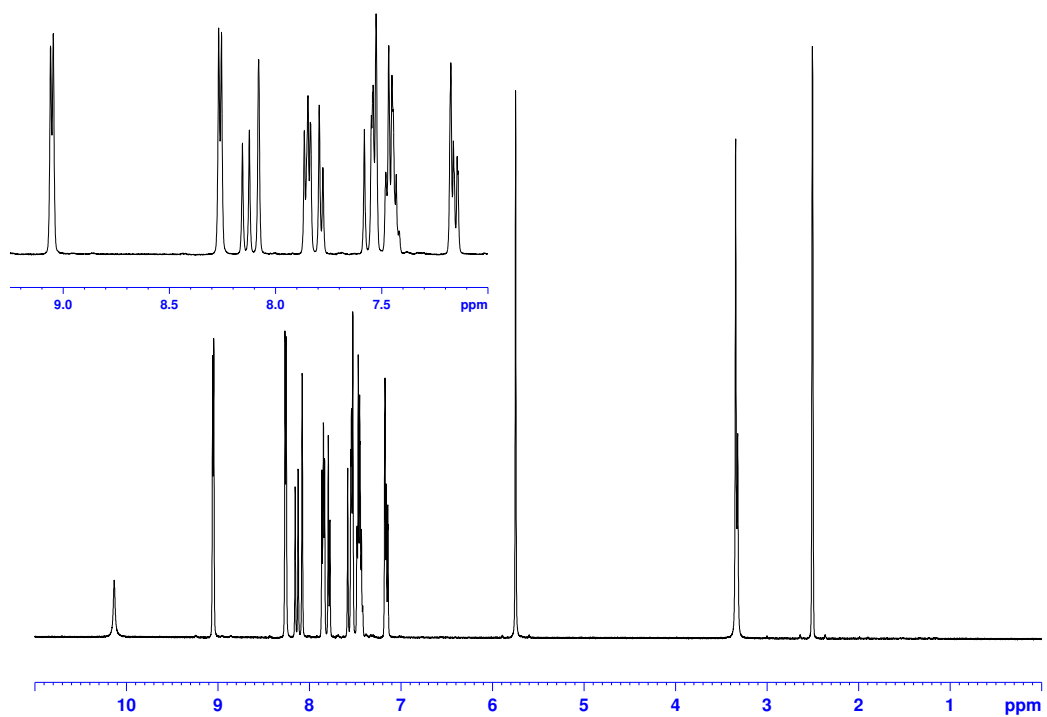

$^{13}\text{C}$  NMR of **11**

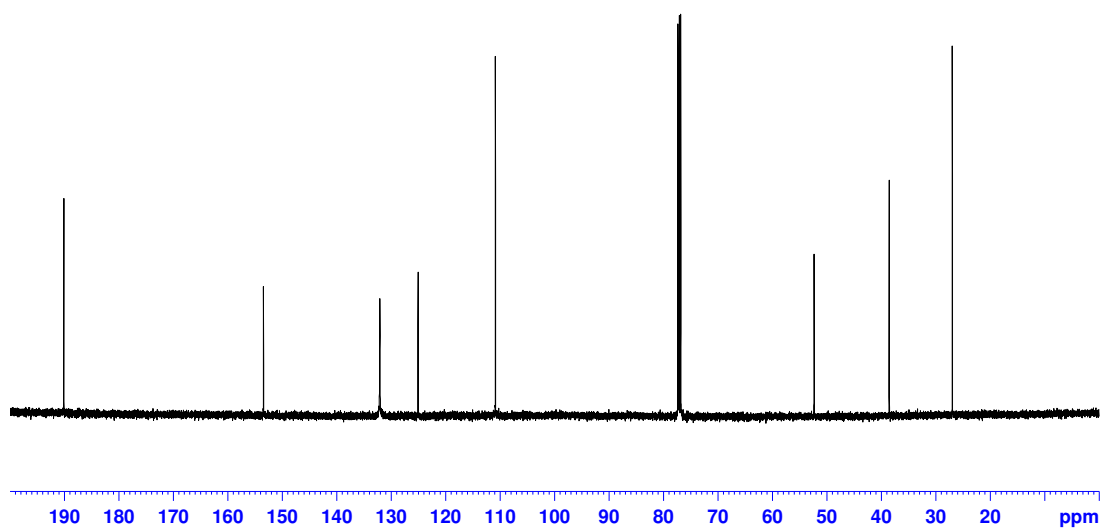

$^{13}\text{C}$  NMR of **D2**

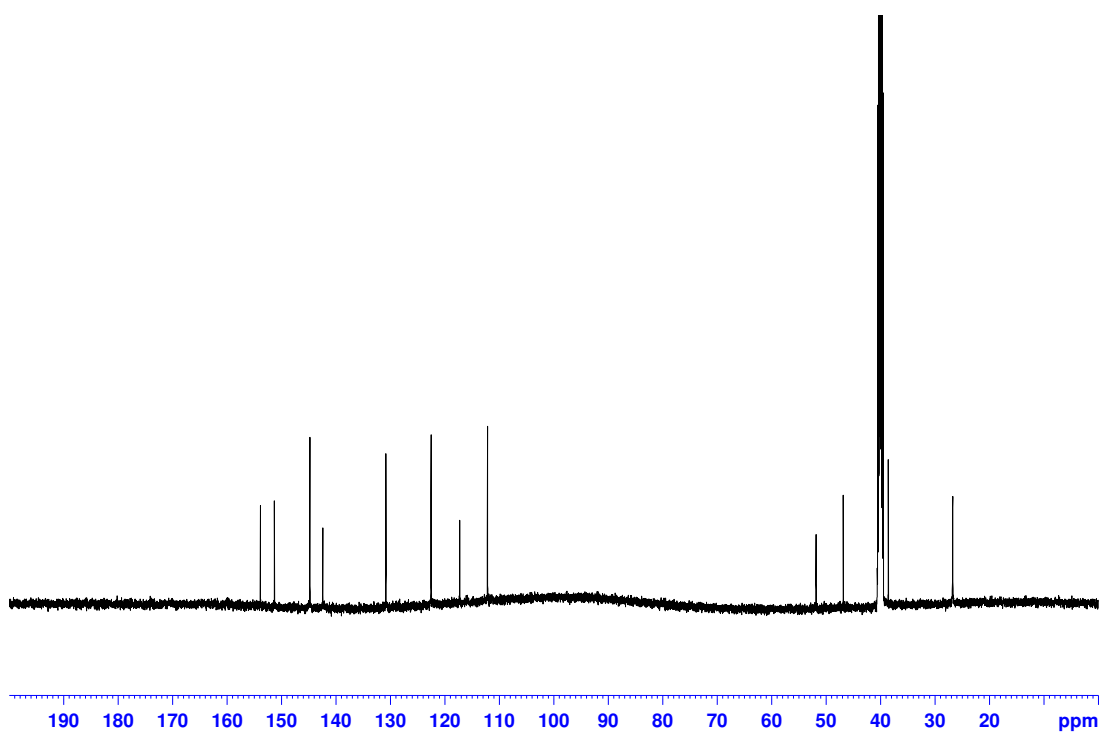

$^{13}\text{C}$  NMR of **H2**

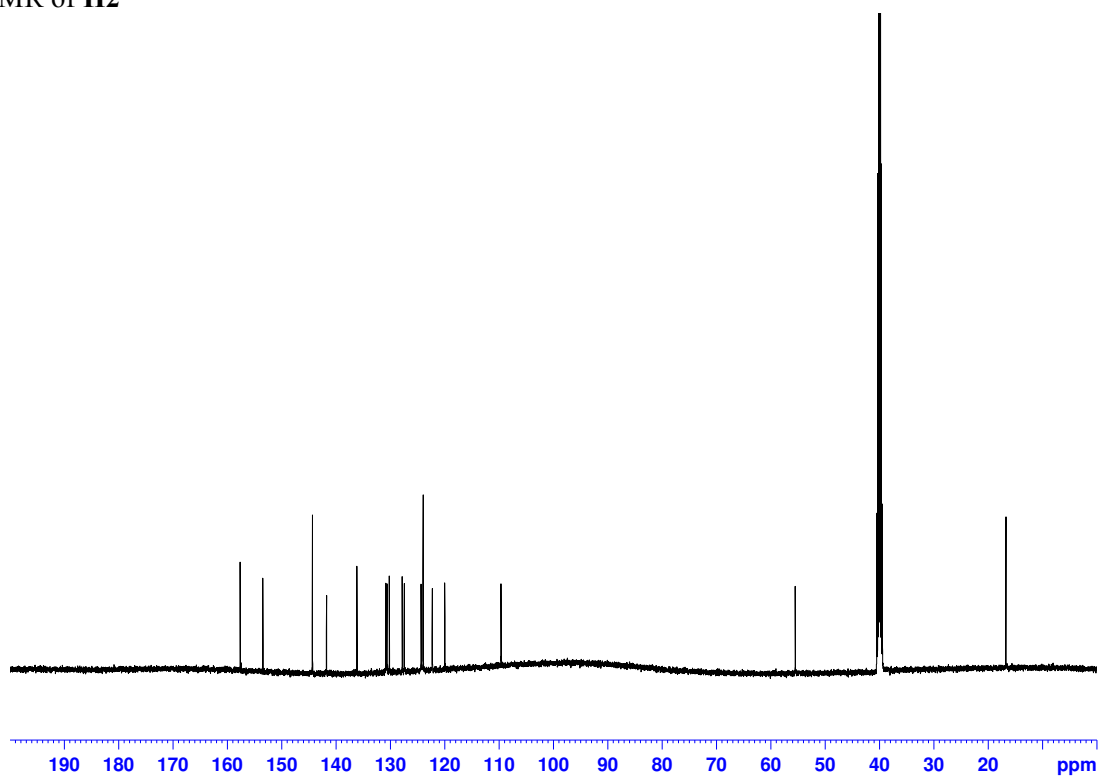

$^{13}\text{C}$  NMR of **H3**

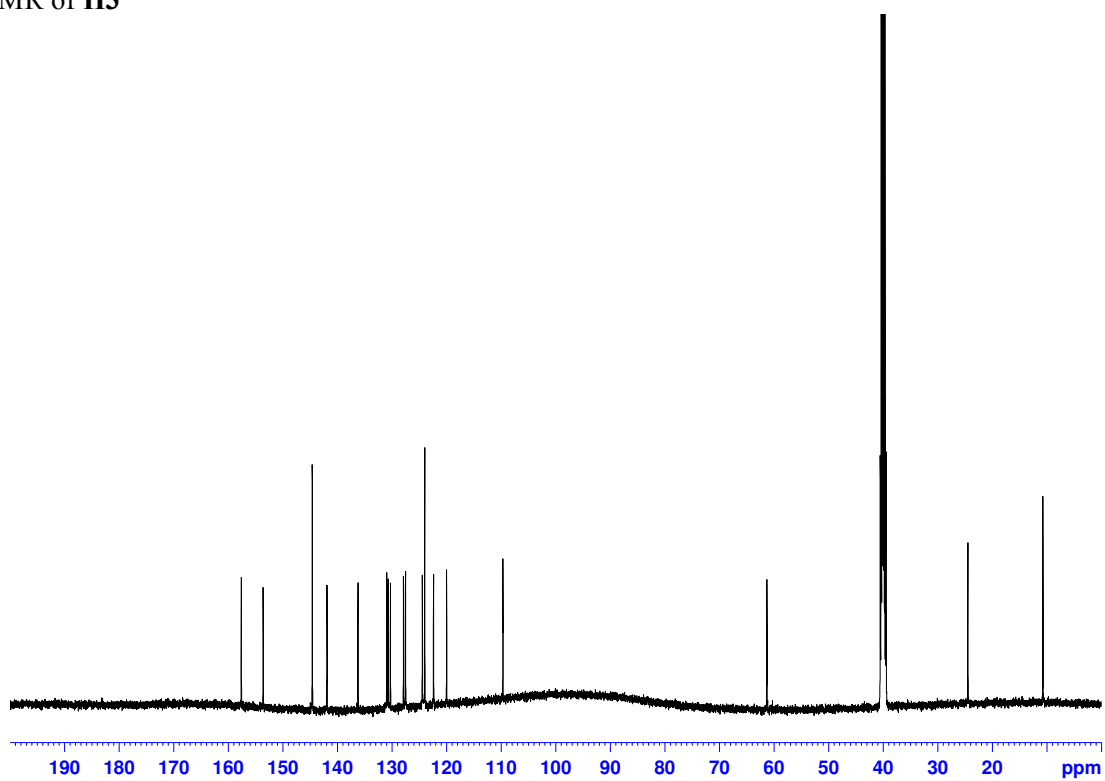

$^{13}\text{C}$  NMR of **H4**

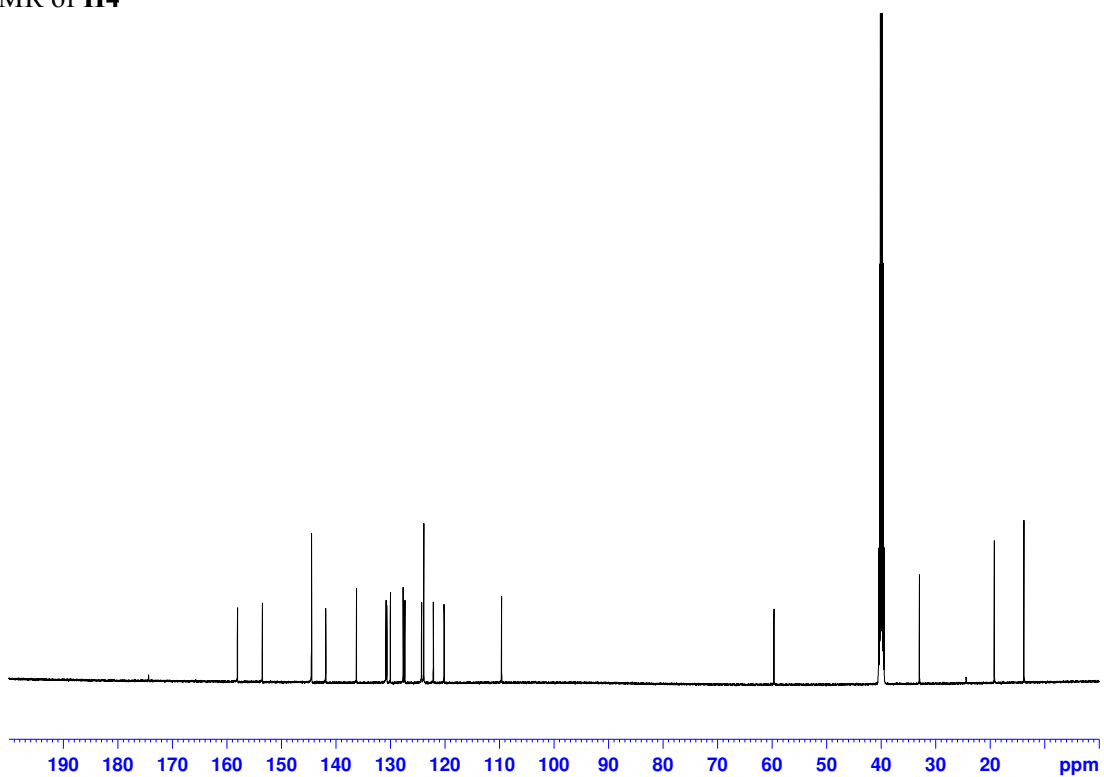

$^{13}\text{C}$  NMR of **H5**

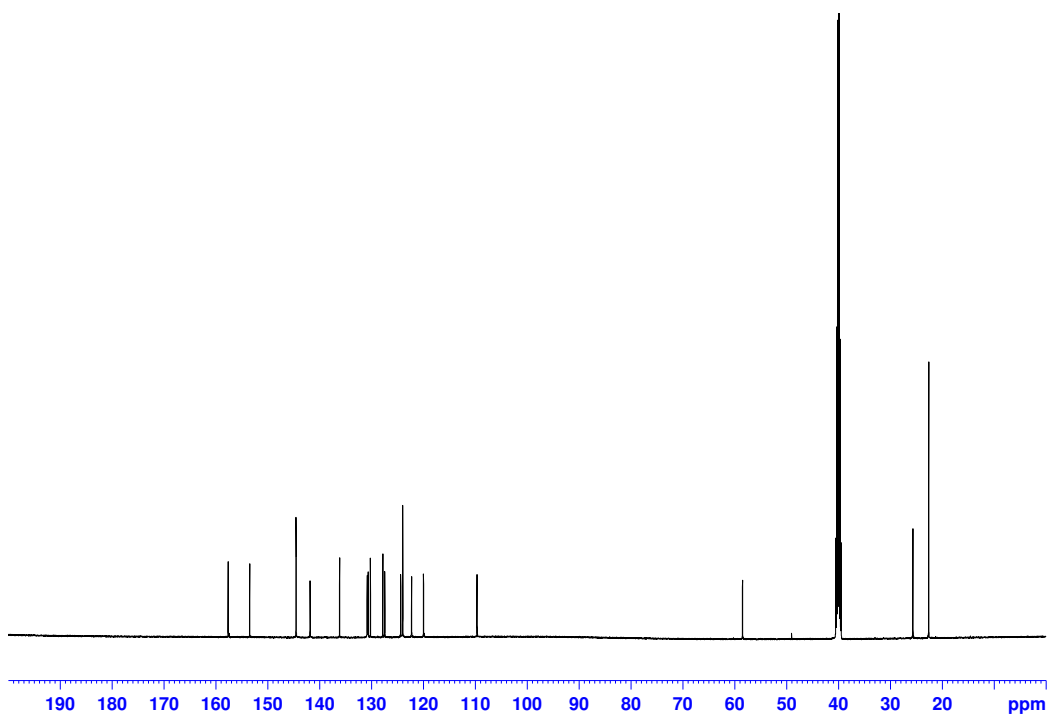



$^{13}\text{C}$  NMR of **H6**

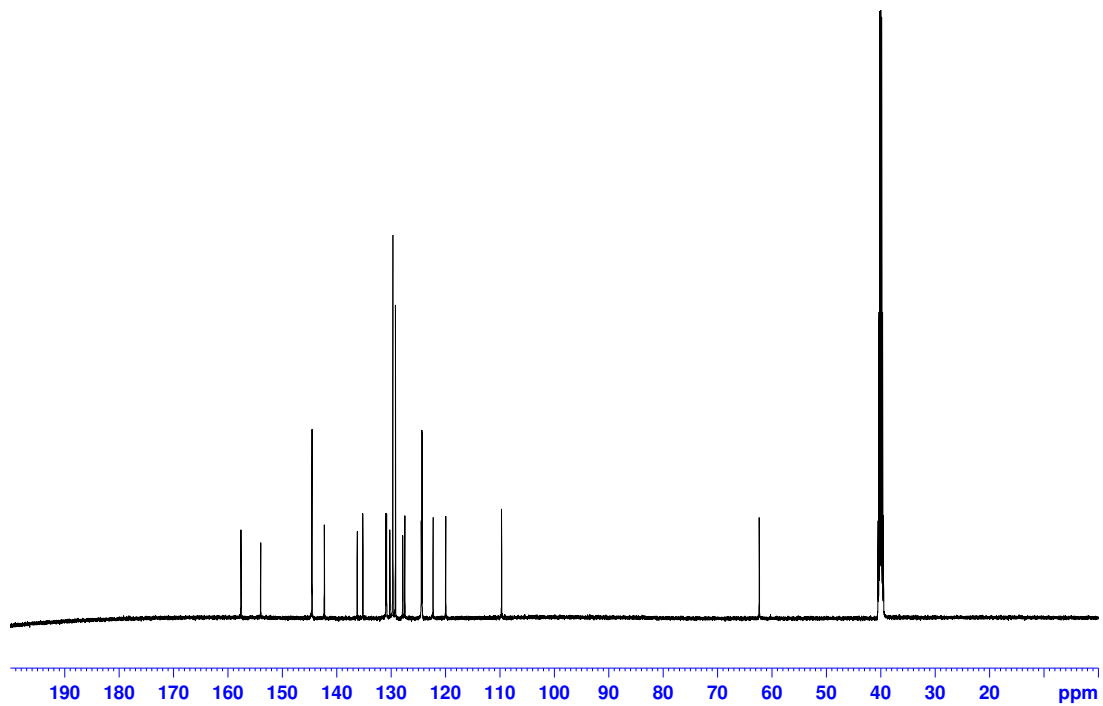

HSQC of **11**

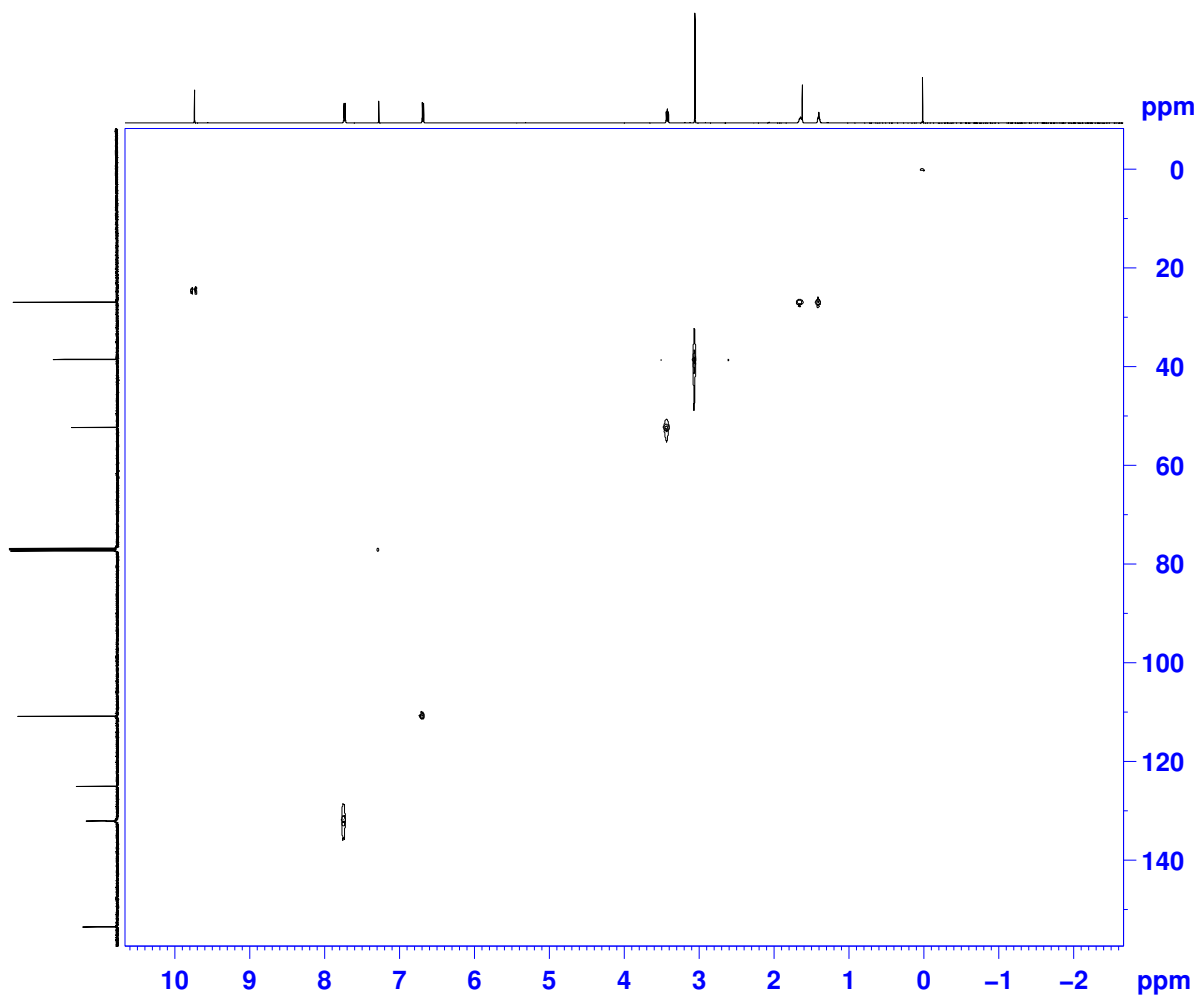

**Table S1.** Calculated  $S_0 \rightarrow S_1$  transition energies and oscillator strength vs. interplanar twist angle.

| <b>A1</b>                 |                              |      |                              |      |                              |      |
|---------------------------|------------------------------|------|------------------------------|------|------------------------------|------|
|                           | toluene                      |      | THF                          |      | water                        |      |
|                           | $S_0 \rightarrow S_1$ E (eV) | $f$  | $S_0 \rightarrow S_1$ E (eV) | $f$  | $S_0 \rightarrow S_1$ E (eV) | $f$  |
| GS optimized <sup>a</sup> | 2.49                         | 1.41 | 2.56                         | 1.34 | 2.61                         | 1.29 |
| 10                        | 2.48                         | 1.39 | 2.55                         | 1.31 | 2.61                         | 1.26 |
| 20                        | 2.44                         | 1.31 | 2.52                         | 1.23 | 2.57                         | 1.2  |
| 30                        | 2.37                         | 1.17 | 2.45                         | 1.1  | 2.52                         | 1.05 |
| 40                        | 2.25                         | 0.98 | 2.35                         | 0.91 | 2.43                         | 0.87 |
| 50                        | 2.08                         | 0.74 | 2.21                         | 0.68 | 2.30                         | 0.64 |
| 60                        | 1.86                         | 0.49 | 2.03                         | 0.44 | 2.15                         | 0.41 |
| 70                        | 1.59                         | 0.25 | 1.82                         | 0.22 | 1.97                         | 0.2  |
| 80                        | 1.31                         | 0.07 | 1.64                         | 0.06 | 1.83                         | 0.05 |
| 90                        | 1.17                         | 0.00 | 1.57                         | 0.00 | 1.77                         | 0.00 |

  

| <b>H1</b>                 |                              |      |                              |      |                              |      |
|---------------------------|------------------------------|------|------------------------------|------|------------------------------|------|
|                           | toluene                      |      | THF                          |      | water                        |      |
|                           | $S_0 \rightarrow S_1$ E (eV) | $f$  | $S_0 \rightarrow S_1$ E (eV) | $f$  | $S_0 \rightarrow S_1$ E (eV) | $f$  |
| GS optimized <sup>b</sup> | 2.43                         | 0.95 | 2.61                         | 0.94 | 2.71                         | 0.93 |
| 10                        | 2.41                         | 0.93 | 2.59                         | 0.92 | 2.71                         | 0.91 |
| 20                        | 2.38                         | 0.87 | 2.57                         | 0.85 | 2.69                         | 0.84 |
| 30                        | 2.32                         | 0.77 | 2.53                         | 0.75 | 2.66                         | 0.74 |
| 40                        | 2.23                         | 0.63 | 2.48                         | 0.62 | 2.62                         | 0.6  |
| 50                        | 2.12                         | 0.48 | 2.40                         | 0.46 | 2.56                         | 0.45 |
| 60                        | 1.98                         | 0.32 | 2.31                         | 0.3  | 2.50                         | 0.28 |
| 70                        | 1.83                         | 0.16 | 2.23                         | 0.15 | 2.44                         | 0.14 |
| 80                        | 1.70                         | 0.04 | 2.16                         | 0.04 | 2.40                         | 0.04 |
| 90                        | 1.65                         | 0.00 | 2.00                         | 0.00 | 2.39                         | 0.00 |

<sup>a</sup> for **A1** the ground state geometry exhibits interplane twist angles of 0.4°, 0.4° and 0.5° in toluene, THF and water, respectively.

<sup>b</sup> for **H1** the ground state geometry exhibits interplane twist angles of 1.6°, 1.5° and 0.1° in toluene, THF and water, respectively.
